# Supplementary material for: 2D P-doped carbon nitride as an effective artificial solid electrolyte interphase for the protection of Li anodes
Source: Royal Society of Chemistry journal article supplement (doi:10.1039/d4cp04183f), 2024-12-23
Supplement: d4cp04183f1.pdf [file d4cp04183f1.pdf]

## Supporting Information

# 2D P-Doped Carbon Nitride as an Effective Artificial Solid Electrolyte Interphase for the Protection of Li Anodes

*Franco Eroles, <sup>a,b</sup> Yesica Celeste Villagrán López, <sup>c</sup> María Beatriz López, <sup>c</sup> Martin E. Zoloff  
Michoff, \* <sup>b,d</sup> Guillermina Luque, <sup>b,d</sup> Fernando Cometto\* <sup>a,b</sup>*

- a) Universidad Nacional de Córdoba, Facultad de Ciencias Químicas, Departamento de Fisicoquímica, X5000HUA, Córdoba, Argentina.
- b) Consejo Nacional de Investigaciones Científicas y Técnicas (CONICET), Instituto de Investigaciones en Fisicoquímica de Córdoba (INFIQC), X5000HUA, Córdoba, Argentina.
- c) CONICET and CIFTA, Facultad de Ciencias Exactas y Naturales, Universidad Nacional de Catamarca, Catamarca, Argentina.
- d) Universidad Nacional de Córdoba, Facultad de Ciencias Químicas, Departamento de Química Teórica y Computacional, X5000HUA, Córdoba, Argentina.

|     |                    | BE    | CNP (%At) | CN (%At) |
|-----|--------------------|-------|-----------|----------|
| C1s | C-C                | 284   | 9.2       | 7.6      |
|     | C-N-P              | 285.9 | 12.9      |          |
|     | C <sub>3</sub> -N  | 286.7 |           | 11.8     |
|     | C-N<br>pyridinic   | 288.4 | 15.2      | 28.1     |
|     | $\pi$ - $\pi$      | 290.9 |           |          |
|     | <i>TOT. %</i>      |       | 37.3      | 47.5     |
| N1s | N<br>pyridinic     | 397.4 | 7.7       | 24.4     |
|     | C-NH <sub>2</sub>  | 398.5 | 10.1      | 12.5     |
|     | C <sub>2</sub> -NH | 399.7 | 8.4       | 11.7     |
|     | N-P                | 400.8 | 8.4       |          |
|     | NQ                 | 402.5 | 2.4       | 3.9      |
|     | <i>TOT. %</i>      |       | 37        | 52.5     |
| P2p | P-N                | 133.5 | 11.5      |          |
|     | P-O <sub>3</sub>   | 135.5 | 14.2      |          |
|     | <i>TOT. %</i>      |       | 25.7      |          |

**Table S1.** Binding Energy and Chemical composition of CNP and CN powders.

|     |                                  | CNP 1x anode |             |             | Non-modified Li anode |             |             |             |
|-----|----------------------------------|--------------|-------------|-------------|-----------------------|-------------|-------------|-------------|
|     |                                  |              | 0s          | 10s         | 30s                   | 0s          | 10s         | 30s         |
|     |                                  | BE           | %At         | %At         | %At                   | %At         | %At         | %At         |
| C1s | C-Li                             | 282.6        | 1.7         | 1.1         | 1.1                   | 1.2         | 1           | 0.9         |
|     | C-C                              | 284.4        | 28.5        | 11.3        | 8.8                   | 25          | 8.5         | 7.8         |
|     | C=O                              | 286.2        | 6.8         | 3.3         | 1.9                   | 5.8         | 2.1         | 1.7         |
|     | C O <sub>3</sub>                 | 288.4        | 3.4         | 2.1         | 0.9                   | 2.8         | 1.7         | 1.3         |
|     | C-SO <sub>x</sub>                | 289.4        |             |             | 0.7                   |             | 0.6         | 0.6         |
|     | C-F                              | 292.5        | 1.6         | 0.7         | 0.5                   | 2.8         | 0.8         | 0.6         |
|     | <i>TOT. %</i>                    |              | <i>42.1</i> | <i>18.5</i> | <i>13.9</i>           | <i>37.6</i> | <i>14.7</i> | <i>12.9</i> |
| N1s | Li3N                             | 398.1        | 1.8         | 1.3         | 0.9                   | 1.4         | 0.8         | 0.4         |
|     | LiTFSI                           | 400          | 1.5         | 1.4         | 1                     | 1.6         | 1.4         | 1           |
|     | <i>TOT. %</i>                    |              | <i>3.3</i>  | <i>2.7</i>  | <i>1.9</i>            | <i>3</i>    | <i>2.2</i>  | <i>1.4</i>  |
| O1s | Li2O                             | 528.5        | 1.2         | 3.1         | 4.2                   | 0.8         | 2.6         | 3.6         |
|     | LiHCO <sub>3</sub>               | 531.8        | 15          | 14.7        | 11.3                  | 12.8        | 13.6        | 11.8        |
|     | C=O                              | 533.1        | 6.2         | 1.1         | 2.2                   | 8.1         | 2.2         | 2.1         |
|     | <i>TOT. %</i>                    |              | <i>22.4</i> | <i>18.9</i> | <i>17.7</i>           | <i>21.7</i> | <i>18.3</i> | <i>17.5</i> |
| F1s | LiF                              | 685.3        | 3.9         | 16.9        | 17.3                  | 12.4        | 23.4        | 26          |
|     | LiTFSi                           | 688.8        | 8.4         | 3.1         | 2.1                   | 3.8         | 3.5         | 2.6         |
|     | <i>TOT. %</i>                    |              | <i>12.3</i> | <i>20</i>   | <i>19.4</i>           | <i>16.2</i> | <i>26.9</i> | <i>28.6</i> |
| P2p | Li-N                             | 133.4        |             | 0.2         | 0.3                   |             |             |             |
|     | LiPO <sub>x</sub> F <sub>y</sub> | 136.1        | 0.7         | 0.6         | 1                     |             |             |             |
|     | <i>TOT. %</i>                    |              | <i>0.7</i>  | <i>0.8</i>  | <i>1.3</i>            |             |             |             |
| S2p | Li <sub>2</sub> S                | 160.2        | 0.6         | 1           | 1.1                   | 0.4         | 0.9         | 1.4         |

|    |                                |       |      |      |      |      |      |
|----|--------------------------------|-------|------|------|------|------|------|
|    |                                | 161.9 |      | 0.4  | 0.5  | 0.5  | 0.5  |
|    | Li <sub>2</sub> S <sub>x</sub> | 164   | 0.3  | 0.2  |      | 0.3  | 0.4  |
|    | SO <sub>3</sub>                | 167.2 | 2    | 0.9  | 0.9  | 2.4  | 1.2  |
|    | SO <sub>4</sub>                | 168.9 | 1.8  | 0.5  | 0.2  | 2.5  | 0.6  |
|    | TOT. %                         |       | 4.7  | 3    | 2.7  | 5.6  | 3.6  |
| Li | TOT. %                         |       | 14.5 | 36.1 | 43.1 | 15.9 | 34.3 |

**Table 2.** Binding Energy and Chemical composition of CNP modified and non-modified Li electrodes cycled at 3mA/cm<sup>2</sup> for 150 cycles”

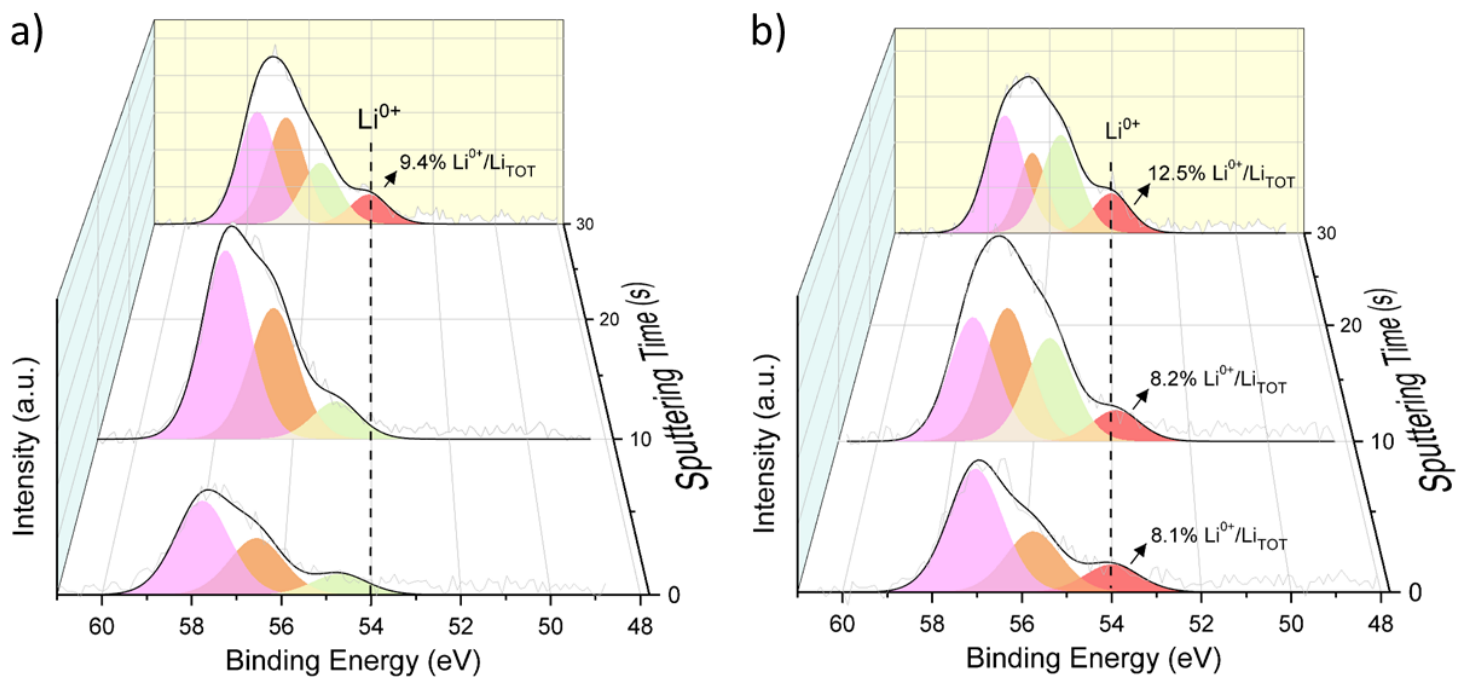

**Figure S1.** Li 1s detailed spectra for the XPS depth profile of a) Li and b) CNP1x anode after 150 cycles of Li plating/stripping at current density of 3mA/cm<sup>2</sup> and a cycling capacity of 1mAh/cm<sup>2</sup>.

## Building the computational model for CNP

Full convergence studies of the calculation parameters were performed on the pristine  $g\text{-C}_3\text{N}_4$  structure, modeled by a single layer of a  $2 \times 2$  slab. In all cases, full geometry optimization of all cartesian coordinates and the cell vectors in the  $xy$ -plane (ie. the plane parallel to the surface) was performed. Different doping configurations were evaluated by replacing either a C or a N atom with a P atom. In the first approximation, the different equivalent C or N atoms, as indicated in Fig. S1, were considered as potential doping sites.

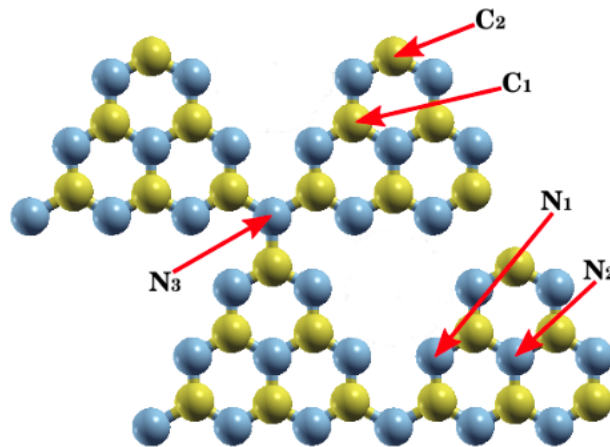

Fig. S2: Different C/N doping positions in pristine  $g\text{-C}_3\text{N}_4$ .

Doping energies were calculated using the following equation:

$$E(\text{doping}) = E(\text{CNP}) - E(\text{CN}) + \Delta H_f(\text{C/N}) - \Delta H_f(\text{P})$$

where  $E(\text{CN})$  and  $E(\text{CNP})$  are the energies of the fully optimized structures for pristine  $g\text{-C}_3\text{N}_4$  and the different P-doped materials, respectively, and  $\Delta H_f(\text{C/N/P})$  are the corresponding elemental enthalpies of formation. These values were taken from the NIST Standard Reference Data

[<https://www.nist.gov/srd>] and are:  $\Delta H_f(\text{C}) = 7.43$  eV,  $\Delta H_f(\text{N}) = 1.98$  eV and  $\Delta H_f(\text{P}) = 3.28$  eV.

The calculated E(doping) values are summarized in Table S1:

Table S1: Doping energies, E(doping), for the different CNP structures obtained by replacing either a N atom (N-doped) or a C atom (C-doped) in pristine g-C<sub>3</sub>N<sub>4</sub>.

| CNP / N-doped | E(doping), eV | CNP / C-doped | E(doping), eV |
|---------------|---------------|---------------|---------------|
| N1            | -372.27       | C1            | -502.66       |
| N2            | -371.35       | C2            | -502.29       |
| N3            | -372.04       |               |               |

The absolute values are certainly not comparable to any experimental measure. This is due to the reference adopted for the atomic species, ie. the elemental  $\Delta H_f$  values. Regardless of this, it is interesting to note that replacing either N<sub>1</sub> or N<sub>3</sub> is energetically more favorable than N<sub>2</sub>, and that C-doped structures are relatively more favorable than N-doped ones. Specifically, C<sub>1</sub> is the most likely doping site to produce graphitic P-doped structures. This result is consistent with experimental findings reported in the literature [R. Škuta *et al.* Applied Surface Science 552 (2021) 149490].

Additional P atoms were incorporated into the CN structure by gradually replacing C<sub>1</sub> atoms in the 2×2 slab. For instance, for the incorporation of the second P atom, starting from the optimized CNP structure that resulted from the replacement of a C<sub>1</sub> atom in pristine g-C<sub>3</sub>N<sub>4</sub> (labeled as g-CNP<sub>1</sub> in Fig. S2 and corresponding to entry C1 under CNP / C-doped in Table S1), all remaining non-equivalent C<sub>1</sub> positions were evaluated. From all these different structures, the one that yielded the most favorable from an energetic point of view is the one labeled as g-CNP<sub>2</sub> in Fig. S2. Following this protocol, the doping percentage gradually increased yielding the doped

structures shown in Fig. S2. The structure in which 8  $C_1$  atoms were replaced by P, ie. corresponding to a doping of 14% ( $g\text{-CNP}_8$  in Fig. S2) is our model for CNP that was employed to study the interaction with lithium, as it is described in the manuscript.

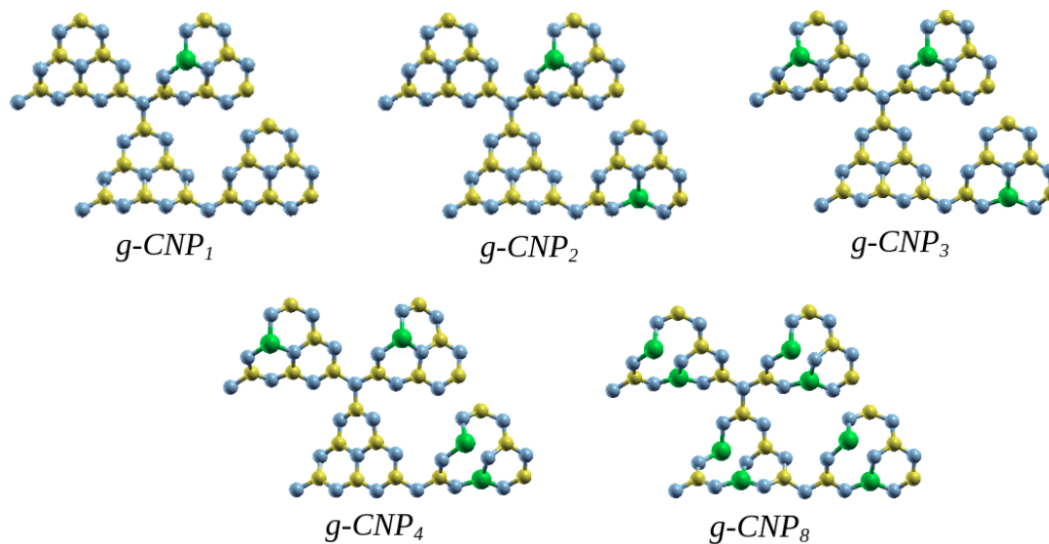

Fig. S3: Most stable structures for different percentages of P-doping pristine  $g\text{-C}_3\text{N}_4$  by replacing  $C_1$  atoms.
